# Supplementary material
Source: publisher site journal article supplement (https://www.dovepress.com/article/443897)
Supplement: Supplementary file 1 [file get_supplementary_file.php]

**Supplementary Material**

**Table S1 Inclusion and exclusion criteria**

|  | **Detailed Description** |
| --- | --- |
| **Inclusion criteria (meet all the following)** | 1. Provision of written informed consent.  2. Age between 15 and 75.  3. Weight over 30kg.  4. Chest radiograph-confirmed lung lesions, suspected of being pulmonary TB.  5. RR-TB confirmed by Xpert® MTB/RIF (Cepheid, Sunnyvale, CA, USA)a.  6. Fluoroquinolones resistance confirmed by genotypic or phenotypic drug susceptibility test.  7. Decision to treat made by an expert panelb.  8. If the participant is a woman of child-bearing potential who is not surgically sterilized, she must agree to practice adequate contraception.  9. If the participant is a breastfeeding woman, she must agree to stop breastfeeding.  10. The participant has an identifiable address and will stay in the area for the study's duration. |
| **Exclusion criteria (meet any of the following)** | 1. Pregnancy or breastfeeding.  2. Inability to take oral medications.  3. Extrapulmonary tuberculosisc.  4. Known resistance to study medications.  5. Known allergy or intolerance to study medications.  6. Received any investigational drug for more than 1 month in the past 3 months.  7. More than one month of treatment directed against RR/MDR-TB within 6 months preceding initiation of study drugs.  8. QTcF ≥ 450 ms or known history of prolonged QT syndrome or having risk factors for prolonged QTd.  9. Certain abnormal laboratory parameters.  • Hemoglobin level of 90 g/L or less;  • Platelet count of 75,000/mm3 or less;  • Serum or plasma alanine aminotransferase (ALT) or aspartate aminotransferase (AST) greater than or equal to 3 times the upper limit of normal;  • Serum or plasma total bilirubin greater than or equal to 2.5 times the upper limit of normal;  • Serum or plasma creatinine level greater than or equal to 1.5 times the upper limit of normal.  10. Cirrhosis (Child class B or C).  11. Alcoholism.  12. Mental illnesses.  13. Poorly controlled diabetes.  14. Cancer.  15. Drug addiction.  16. HIV or AIDS or other immunodeficiency diseases.  17. Critically ill patients with short expected survival.  18. Pregnancy test positive at or within seven days prior to screening for non-sterilized or non-menopausal women.  19. Simultaneous application of drugs that may affect the efficacy of the study or contraindicated with the study drugse.  20. Participation in another drug trial.  21. Other medical conditions that the investigator deems not in the participant's best interest.  22. Current or planned incarceration or other involuntary detention. |
| **Criteria for exclusion after enrollment/Late exclusion (meet any of the following)f** | 1. Negative cultures collected during screening, baseline, and within half a month after enrollment.  2. Phenotypic DST results show susceptibility to rifampicin.  3. Request for withdrawal from the study by the research subject or their legal representative.  4. The participant has adverse events or cannot tolerate the research intervention.  5. The participant becomes pregnant or is unable to take effective contraceptive measures. |

a) A positive sputum specimen for M. tuberculosis by Xpert MTB/RIF with 'medium' or 'high' semiquantitative result and detected rifamycin resistance.

b) Potential subjects: i) Treatment-naive cases with <2 months first-line anti-TB drugs use prior to MDR-TB diagnosis. ii) Treatment failure cases who used or discontinued second-line anti-TB drugs. iii) Recurrent TB cases. A diagnosis and treatment expert group at each sub-center makes the clinical evaluation.

c) This study considers pulmonary TB with/without additional complications within its scope. Extrapulmonary TB refers to TB involving the CNS, bones, joints, miliary TB, or pericardial TB. Severe extrapulmonary TB involves miliary TB or TB meningitis.

d) Risk factors include various heart conditions and abnormalities, such as Q waves, ventricular pre-excitation, bundle branch block, heart block, intraventricular conduction delay, bradycardia, personal or family history of long QT syndrome, heart disease, syncope, arrhythmias, and risk factors for torsades de pointes.

e) Certain drugs including glucocorticoids, interferons, NSAIDs, monoamine oxidase inhibitors, sympathomimetic drugs, vasopressor drugs, dopamine drugs, 5-HI reuptake inhibitors, tricyclic antidepressants, 5-HTI receptor antagonists, and meperidine or buspirone.

f) Research subjects may withdraw at any time for any reason. Investigators must record withdrawal reasons and complete inspections as far as possible. Subjects withdrawing due to adverse reactions or abnormal clinical tests must be followed until recovery or stabilization.

**Table S2 Evaluation schedule of participants on 9-month regimen**

| **Visit window** |  | **Up to 7 days after screen** | **± 3 days** | | | | | | | | | | | **± 7 days** | | | | |  |  |
| --- | --- | --- | --- | --- | --- | --- | --- | --- | --- | --- | --- | --- | --- | --- | --- | --- | --- | --- | --- | --- |
| **Visit** | **Screen** | **Baseline** | M 0.5 | **M 1** | **M 1.5** | **M 2** | **M 3** | **M 4** | **M 5** | **M 6** | **M 7** | **M 8** | **M 9** | **M 12** | **M 15** | **M 18** | **M 21** | **M 24** | **Possible poor treatment response** | **Post-early termination visit** |
| Informed consent | **X** |  |  |  |  |  |  |  |  |  |  |  |  |  |  |  |  |  |  |  |
| Inclusion/exclusion | **X** | **X** |  |  |  |  |  |  |  |  |  |  |  |  |  |  |  |  |  |  |
| Demographics, medical history | **X** |  |  |  |  |  |  |  |  |  |  |  |  |  |  |  |  |  |  |  |
| Contact information | **X** | **X** | **X** | **X** | **X** | **X** | **X** | **X** | **X** | **X** | **X** | **X** | **X** | **X** | **X** | **X** | **X** | **X** | **X** | **X** |
| Interval medical history |  |  |  |  |  |  |  |  |  |  |  |  |  | **X** | **X** | **X** | **X** | **X** | **X** |  |
| Symptoms |  | **X** | **X** | **X** | **X** | **X** | **X** | **X** | **X** | **X** | **X** | **X** | **X** | **X** | **X** | **X** | **X** | **X** | **X** | **X** |
| Concomitant medications |  | **X** | **X** | **X** | **X** | **X** | **X** | **X** | **X** | **X** | **X** | **X** | **X** | **X** | **X** | **X** | **X** | **X** | **X** | **X** |
| Height | **X** |  |  |  |  |  |  |  |  |  |  |  |  |  |  |  |  |  |  |  |
| Weight (kg) | **X** | **X** | **X** | **X** | **X** | **X** | **X** | **X** | **X** | **X** | **X** | **X** | **X** | **X** | **X** | **X** | **X** | **X** | **X** | **X** |
| Visual tests |  | **X** |  |  |  | **X** |  | **X** |  | **X** |  |  | **X** |  |  |  |  |  |  |  |
| Michigan Neuropathy Screening Instruments, MNSI | **X** | **X** | **X** | **X** | **X** | **X** | **X** | **X** | **X** | **X** | **X** | **X** | **X** | **X** | **X** | **X** | **X** | **X** |  |  |
| Self-rating depression scale, Self-rating Anxiety Scale | **X** |  |  | **X** |  | **X** |  | **X** |  | **X** |  |  | **X** |  |  |  |  |  |  |  |
| HIV test | **X** |  |  |  |  |  |  |  |  |  |  |  |  |  |  |  |  |  |  |  |
| Pregnancy testing (urine or blood) | **X** |  |  |  |  |  |  |  |  |  |  |  |  |  |  |  |  |  |  |  |
| Diabetes screen | **X** |  |  |  |  |  |  |  |  |  |  |  |  |  |  |  |  |  |  |  |
| Non-random assignment |  | **X** |  |  |  |  |  |  |  |  |  |  |  |  |  |  |  |  |  |  |
| Sputum for smear and culture | **X** | **X** | **X** | **X** | **X** | **X** | **X** | **X** | **X** | **X** | **X** | **X** | **X** | **X** | **X** | **X** | **X** | **X** | **X** |  |
| Sputum for rapid molecular test, if available at site | **X** |  |  |  |  |  |  |  |  |  |  |  |  |  |  |  |  |  |  |  |
| Phenotypic DST |  | **X** |  |  |  |  |  |  |  |  |  |  |  |  |  |  |  |  |  |  |
| Storage of MTB bacterial isolate | **X** | **X** | **X** | **X** | **X** | **X** | **X** | **X** | **X** | **X** | **X** | **X** | **X** | **X** | **X** | **X** | **X** | **X** | **X** |  |
| Blood tests (ALT, bilirubin, serum albumin, creatinine, potassium, hemoglobin, WBC with differential, platelets) |  | **X** | **X** | **X** | **X** | **X** | **X** | **X** | **X** | **X** | **X** | **X** | **X** | **X** | **X** | **X** | **X** | **X** |  | **X** |
| Storage of blood, sputum and exhaled breath |  | **X** | **X** | **X** | **X** | **X** | **X** | **X** | **X** | **X** | **X** | **X** | **X** | **X** | **X** | **X** | **X** | **X** |  |  |
| Urine routine test |  | **X** |  | **X** |  | **X** |  | **X** |  | **X** |  |  | **X** | **X** | **X** | **X** | **X** | **X** |  |  |
| Chest computed tomography |  | **X** |  |  |  | **X** |  | **X** |  | **X** |  |  | **X** | **X** | **X** | **X** | **X** | **X** | **X** | **X** |
| Electrocardiogram | **X** |  | **X** | **X** | **X** | **X** |  | **X** |  | **X** |  |  | **X** |  |  |  |  |  |  |  |
| Liver ultrasound | **X** |  |  |  |  |  |  |  |  |  |  |  |  |  |  |  |  |  |  |  |
| Adverse events |  | **X** | **X** | **X** | **X** | **X** | **X** | **X** | **X** | **X** | **X** | **X** | **X** | **X** | **X** | **X** | **X** | **X** |  | **X** |
| Contact central study clinician |  | **X** |  |  |  |  |  |  |  | **X** |  |  | **X** |  |  |  |  |  | **X** |  |

**Table S3 Evaluation schedule of participants on 12-month regimen**

| **Visit window** |  | **Up to 7 days after screen** | **± three (3) days** | | | **± seven (7) days** | | | | | | | | | | | **± seven (7) days** | | | |  |  |
| --- | --- | --- | --- | --- | --- | --- | --- | --- | --- | --- | --- | --- | --- | --- | --- | --- | --- | --- | --- | --- | --- | --- |
| **Visit** | **Screen** | **Baseline** | M 0.5 | **M 1** | **M 1.5** | **M 2** | **M 3** | **M 4** | **M 5** | **M 6** | **M 7** | **M 8** | **M 9** | **M 10** | **M 11** | **M 12** | **M 15** | **M 18** | **M 21** | **M 24** | **Possible poor treatment response** | **Post-early termination visit** |
| Informed consent | **X** |  |  |  |  |  |  |  |  |  |  |  |  |  |  |  |  |  |  |  |  |  |
| Inclusion/exclusion | **X** | **X** |  |  |  |  |  |  |  |  |  |  |  |  |  |  |  |  |  |  |  |  |
| Demographics, medical history | **X** |  |  |  |  |  |  |  |  |  |  |  |  |  |  |  |  |  |  |  |  |  |
| Contact information | **X** | **X** | **X** | **X** | **X** | **X** | **X** | **X** | **X** | **X** | **X** | **X** | **X** | **X** | **X** | **X** | **X** | **X** | **X** | **X** | **X** | **X** |
| Interval medical history |  |  |  |  |  |  |  |  |  |  |  |  |  |  |  |  | **X** | **X** | **X** | **X** | **X** |  |
| Symptoms |  | **X** | **X** | **X** | **X** | **X** | **X** | **X** | **X** | **X** | **X** | **X** | **X** | **X** | **X** | **X** | **X** | **X** | **X** | **X** | **X** | **X** |
| Concomitant medications |  | **X** | **X** | **X** | **X** | **X** | **X** | **X** | **X** | **X** | **X** | **X** | **X** | **X** | **X** | **X** | **X** | **X** | **X** | **X** | **X** | **X** |
| Height | **X** |  |  |  |  |  |  |  |  |  |  |  |  |  |  |  |  |  |  |  |  |  |
| Weight (kg) | **X** | **X** | **X** | **X** | **X** | **X** | **X** | **X** | **X** | **X** | **X** | **X** | **X** | **X** | **X** | **X** | **X** | **X** | **X** | **X** | **X** | **X** |
| Visual tests |  | **X** |  |  |  | **X** |  | **X** |  | **X** |  |  | **X** |  |  | **X** |  |  |  |  |  |  |
| Michigan Neuropathy Screening Instruments, MNSI | **X** | **X** | **X** | **X** | **X** | **X** | **X** | **X** | **X** | **X** | **X** | **X** | **X** | **X** | **X** | **X** | **X** | **X** | **X** | **X** |  |  |
| Self-rating depression scale, Self-rating Anxiety Scale | **X** |  |  | **X** |  | **X** |  | **X** |  | **X** |  |  | **X** |  |  | **X** |  |  |  |  |  |  |
| HIV test | **X** |  |  |  |  |  |  |  |  |  |  |  |  |  |  |  |  |  |  |  |  |  |
| Pregnancy testing (urine or blood) | **X** |  |  |  |  |  |  |  |  |  |  |  |  |  |  |  |  |  |  |  |  |  |
| Diabetes screen | **X** |  |  |  |  |  |  |  |  |  |  |  |  |  |  |  |  |  |  |  |  |  |
| Non-random assignment |  | **X** |  |  |  |  |  |  |  |  |  |  |  |  |  |  |  |  |  |  |  |  |
| Sputum for smear and culture | **X** | **X** | **X** | **X** | **X** | **X** | **X** | **X** | **X** | **X** | **X** | **X** | **X** | **X** | **X** | **X** | **X** | **X** | **X** | **X** | **X** |  |
| Sputum for rapid molecular test, if available at site | **X** |  |  |  |  |  |  |  |  |  |  |  |  |  |  |  |  |  |  |  |  |  |
| Phenotypic DST |  | **X** |  |  |  |  |  |  |  |  |  |  |  |  |  |  |  |  |  |  |  |  |
| Storage of MTB bacterial isolate | **X** | **X** | **X** | **X** | **X** | **X** | **X** | **X** | **X** | **X** | **X** | **X** | **X** | **X** | **X** | **X** | **X** | **X** | **X** | **X** | **X** |  |
| Blood tests (ALT, bilirubin, serum albumin, creatinine, potassium, hemoglobin, WBC with differential, platelets) |  | **X** | **X** | **X** | **X** | **X** | **X** | **X** | **X** | **X** | **X** | **X** | **X** | **X** | **X** | **X** | **X** | **X** | **X** | **X** |  | **X** |
| Storage of blood, sputum and exhaled breath |  | **X** | **X** | **X** | **X** | **X** | **X** | **X** | **X** | **X** | **X** | **X** | **X** | **X** | **X** | **X** | **X** | **X** | **X** | **X** |  |  |
| Urine routine test |  | **X** |  | **X** |  | **X** |  | **X** |  | **X** |  |  | **X** |  |  | **X** | **X** | **X** | **X** | **X** |  |  |
| Chest computed tomography |  | **X** |  |  |  | **X** |  | **X** |  | **X** |  |  | **X** |  |  | **X** | **X** | **X** | **X** | **X** | **X** | **X** |
| Electrocardiogram | **X** |  | **X** | **X** | **X** | **X** |  | **X** |  | **X** |  |  | **X** |  |  | **X** |  |  |  |  |  |  |
| Liver ultrasound | **X** |  |  |  |  |  |  |  |  |  |  |  |  |  |  |  |  |  |  |  |  |  |
| Adverse events |  | **X** | **X** | **X** | **X** | **X** | **X** | **X** | **X** | **X** | **X** | **X** | **X** | **X** | **X** | **X** | **X** | **X** | **X** | **X** |  | **X** |
| Contact central study clinician |  | **X** |  |  |  |  |  |  |  | **X** |  |  | **X** |  |  | **X** |  |  |  |  | **X** |  |

**Table S4 Primary and secondary outcome measures**

| **Primary outcome** | **Description** |
| --- | --- |
| a) | Unfavorable Outcome: Occurrence of bacteriologic failure, relapse, or clinical failure tracked through to 12 months post-treatment. [Time Frame: 0, 0.5, 1, 1.5, 2, 3, 4, 5, 6, 7, 8 and 9 months during the treatment period; 3, 6, 9 and 12 months during the follow-up period] |
| **Secondary outcome** |  |
| a) | Sputum culture conversion proportion at month 2. [Time Frame: 0, 0.5, 1, 1.5 and 2 Month during the treatment period] |
| b) | Time to sputum culture conversion after treatment start. [Time Frame: 0, 0.5, 1, 1.5, 2, 3, 4, 5, 6, 7, 8 and 9 months during the treatment period] |
| c) | "Favorable Treatment Response at Month 6 (FR-6)" Definition: This outcome is achieved when all the following criteria are met:  a. Sputum Culture Conversion at Month 6: This requires two consecutive cultures taken at least 7 days apart, with the last culture completed within the 6-month visit. No positive culture results should be found in between, and no reversion should occur.  b. Adequate Treatment at Month 6: This excludes participants who have received fewer than roughly 90% of the prescribed study doses. This is defined as approximately 90% of doses within 125% of the planned treatment duration, with at least 162 doses taken, and no more than 225 days passing since the start of treatment.  c. Chest Radiographic Stabilization at Month 6: This is defined as two consecutive chest CT scans, taken at least 2 months apart with the last scan conducted within the 6-month visit, interpreted by imaging experts as showing either:  1) Lesions resorbing significantly, completely, or remaining unchanged;  2) Cavities closing, reducing, or remaining unchanged.  Notes:   |  | With significant absorption | With complete absorption | Unchanged | | --- | --- | --- | --- | | Lesion reduction | ≥50% | ≥20% and＜50% | ＜20% | | Cavity reduction | Closed or disappeared | ≥50% | ＜50% | |
| d) | Incidence of Treatment Emergent Adverse Events (TEAEs): This term refers to the occurrence rate and severity of TEAEs, specifically including Grade 3 or higher adverse events (AEs) and serious adverse events (SAEs) of any grade, which are observed by the 9-month mark. This also encompasses both tuberculosis-related and non-tuberculosis-related fatalities. [Time Frame: 0, 0.5, 1, 1.5, 2, 3, 4, 5, 6, 7, 8 and 9 months during the treatment period] |

**Table S5 Trial regimens**

| **Regimen** | **Drugs** | **Durations** |
| --- | --- | --- |
| A | bedaquiline, linezolid, cycloserine, clofazimine and pyrazinamide | 9-12 months |
| B | linezolid, cycloserine, clofazimine, pyrazinamide and Sulfasalazine | 9-12 months |

**Table S6 Trial regimen drugs and doses**

| **Drug** | **Weight group** | | **Usage** |
| --- | --- | --- | --- |
| ≤50kg | >50kg |
| Bedaquiline | 400 mg daily for 2 weeks followed by 200 mg three times a week | | Once, with meal |
| Linezolid | 600 mg daily | | Once, before or after meal |
| Cycloserine | 500 mg daily | 750mg daily | Divided in two doses, before or after meal |
| Clofazimine | 100 mg daily | | Once, with meal |
| Pyrazinamide | 1500 mg daily | | Once, before or after meal |
| Sulfasalazine | 3000mg daily | | Divided in three doses, with meal |

**Table S7 Definition of the favorable and unfavorable outcomes**

| **Outcome** | **Description** |
| --- | --- |
| **Unfavorable outcome** | A participant will be classified as having an unfavorable outcome under any of the following conditions:  • Absence of Bacteriological Cure: This condition applies if a participant produces a sputum sample at or after the last treatment month (month 9) and no later than the end of the follow-up (month 21) visit window that tests positive for an MTB Culture, which is indistinguishable from the initial isolate. This must be confirmed by a second sample that also tests positive for MTB Culture. Note: a single positive sputum culture result, followed by subsequent negative cultures, will not be considered indicative of an absence of bacteriological cure. Both solid and liquid cultures are permissible and should be clearly recorded. If strain analysis results are inconclusive, unavailable, or cannot be performed, it will be assumed that the strains were indistinguishable.  • Persistent MTB Positive Culture: This condition applies to participants who had an MTB Positive culture result at their last visit during or prior to the month 9 analysis visit window, irrespective of a second sample confirmation, unless determined to have been re-infected.  • Death During Treatment: Participants who die from any cause during treatment, excluding violent or accidental causes (e.g. road traffic accidents), will be considered to have an unfavorable outcome. Suicides during the study treatment will also be classified as unfavorable.  • TB-Related Death During Follow-Up: Participants who die during the follow-up phase where the cause of death is considered related to tuberculosis.  • Early Withdrawal or Lost to Follow-Up: Participants who withdraw early or are lost to follow-up prior to the scheduled end of treatment are considered unfavorable, except for cases involving pregnancy or violent/accidental death, which will instead be classified as "Not Assessable".  • Non-Protocol Treatment: Participants receiving any of the following treatments, unless administered for failure or recurrence subsequently shown to be a reinfection with a different strain of MTB identified at study entry through genotyping methods:  a) Extended treatment beyond the protocol parameters, excluding temporary drug re-challenge, over-treatment with drugs from assigned study kits, or making up for missed treatment days (maximum 8 weeks). Any treatment extension exceeding half a month (15 days), irrespective of the reason, will be considered an unfavorable outcome.  b) Re-initiation of treatment for active TB.  c) Discontinuation of more than one drug in a specific regimen for any reason, except for reinfection, pregnancy, or temporary drug challenge. This excludes frequency or dosage adjustments of a single drug. |
| **Favorable outcome** | A participant will be classified as having a favorable outcome under any of the following conditions, provided no unfavorable outcome has occurred:  • Negative MTB Culture: Participants whose last culture result during the Month 9 analysis visit window is MTB Negative and there are no subsequent positive cultures until the end of the follow-up period.  • Absence of Active TB Symptoms/Signs: Participants seen during the Month 9 analysis visit window who show no symptoms/signs of ongoing active TB (as indicated by a lack of initiation of possible poor treatment response evaluation or absence of active TB symptoms/signs), and have achieved culture conversion prior to Month 9 (for the 9-month regimen), with no subsequent positive cultures until the end of the follow-up period. Additionally, these participants either:  a) Are unable to produce a sputum specimen at any point during the Month 9 analysis visit window, or  b) Produce a sputum specimen that is contaminated or unevaluable without evidence of MTB, and no sputum specimens yield positive or negative culture results during the Month 9 analysis visit window. |
| **Not assessable** | A participant will be categorized as having a "Not Assessable" outcome if any of the following conditions are met, and an unfavorable outcome has not occurred:  • Missed Visit with Last Negative Culture: Participants not otherwise classified as unfavorable, but who do not attend a visit within the Month 21 analysis visit window or thereafter, and whose last culture result is negative for MTB.  • Pregnancy: Women who become pregnant during the assigned study treatment and are subsequently withdrawn from the study after enrollment.  • Non-TB Related Death During Follow-up: Participants who die during the follow-up phase due to causes not related to tuberculosis.  • Accidental or Violent Death During Treatment: Participants who die from a violent (e.g. homicide) or accidental (e.g. road traffic accident) cause during their assigned study treatment. Note: as previously stated, suicide will be considered an unfavorable outcome.  • Retreatment or Changed/Extended Treatment Due to Reinfection: Participants who are either retreated, have their treatment changed or extended, and are demonstrated to be re-infected with a strain of MTB that is different from the strain or strains identified at study entry through genotyping methods. |

Each participant's outcome will fall into one of three categories: 1. "Absence of cure" (unfavorable outcome). 2. "Cure" (favorable outcome). 3. "Not assessable". The primary outcome will be determined at the 21-month post-assignment of study treatment. For all analyses, the actual visit dates will be used, not the scheduled visit dates (e.g., month 2, month 9). The primary analysis of the primary efficacy outcome will include data only through the end of the Month 21 analysis visit window.
